# Supplementary material for: Lyophilization for Formulation Optimization of Drug-Loaded Thermoresponsive Polyelectrolyte Complex Nanogels from Functionalized Hyaluronic Acid
Source: Pharmaceutics. 2023 Mar 13;15(3):929. doi: 10.3390/pharmaceutics15030929 (PMC10053597; doi:10.3390/pharmaceutics15030929)
Supplement: Supplementary file 1 [file pharmaceutics-15-00929-s001.zip › pharmaceutics-2256260-supplementary.pdf]

# Supplementary Materials: Lyophilization for Formulation Optimization of Drug-Loaded Thermoresponsive Polyelectrolyte Complex Nanogels from Functionalized Hyaluronic Acid

Huu Van LE, Virginie DULONG, Luc PICTON, and Didier LE CERF \*

## 1. Thermoresponsiveness of reconstituted PEC-NGs after lyophilization

HA-M2005/PLL PEC-NGs ( $n/n^+ = 2.5$ ) prepared at  $C_P = 0.5 \text{ g.L}^{-1}$  were lyophilized with 2 % m/v trehalose and then reconstituted at the same  $C_P$  in Milli-Q water. DLS characterization was performed on reconstituted PEC-NGs at 25 °C (after 120 s of temperature stabilization) and then at 50 °C (after 10 min of temperature stabilization) (**Error! Reference source not found.**).

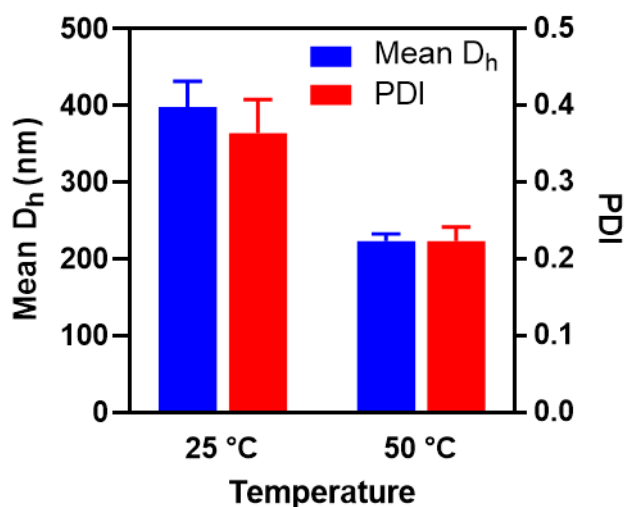

**Figure S1.** Mean  $D_h$  and PDI of reconstituted HA-M2005/PLL PEC-NGs ( $n/n^+ = 2.5$ ,  $C_P = 0.5 \text{ g.L}^{-1}$ ) at 25 and 50 °C ( $n \geq 3$ ).

## 2. Stability of reconstituted PEC-NGs after lyophilization

HA-M2005/PLL PEC-NGs ( $n/n+ = 2.5$ ) prepared at  $C_P = 0.2 \text{ g.L}^{-1}$  were lyophilized with 1 % m/v trehalose and then reconstituted in PBS to reach final  $C_P = 0.5 \text{ g.L}^{-1}$ , thus  $C_{TRE} = 2.5 \%$ . The reconstituted PEC-NGs were directly characterized by DLS (day 0) and then stored at 4 °C for reevaluation after 1, 3 and 7 days (**Error! Reference source not found.**).

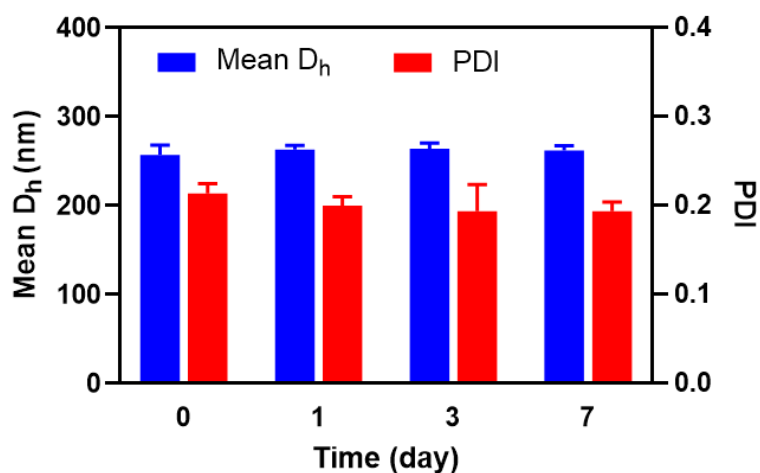

**Figure S2.** Mean  $D_h$  and PDI of HA-M2005/PLL PEC-NGs ( $n/n+ = 2.5$ ) reconstituted at  $C_P = 0.5 \text{ g.L}^{-1}$  and  $C_{TRE} = 2.5 \%$  m/v in PBS (after lyophilization of NGs prepared at  $C_P = 0.2 \text{ g.L}^{-1}$ ) within 7 days of conservation ( $n \geq 3$ ).

### 3. Model fitting of curcumin release data

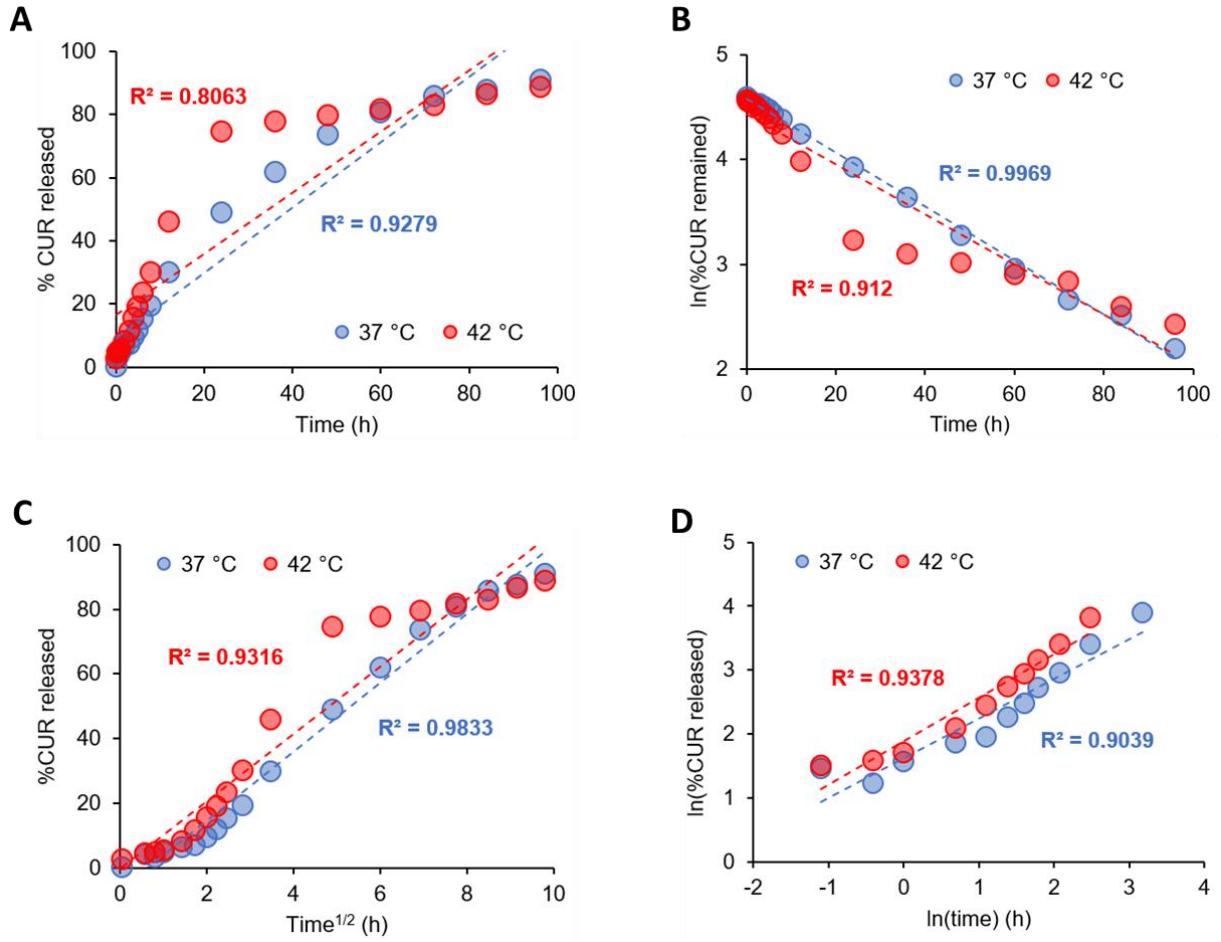

**Figure S3.** Mathematical model fitting of curcumin release data at 37 and 42 °C from HA-M2005/PLL PEC-NGs ( $n/n+ = 2.5$ ) prepared at  $C_P = 0.5 \text{ g.L}^{-1}$ : **(A)** zero-order model (linear regression between time and CUR release fraction), **(B)** first-order model (linear regression between time and logarithm of CUR release fraction), **(C)** Higuchi model (linear regression between CUR release fraction and square root of time), **(D)** Korsmeyer-Peppas model (linear regression between logarithms of both time and the CUR release fraction within the first 60 %).
